# Supplementary material for: Pharmaceutical care needs of patients with chronic respiratory diseases：results from a cross sectional study
Source: Research Square preprint supplement (doi:10.21203/rs.3.rs-6702396/v1), 2025-06-10
Supplement: Supplementary file 1 [file a22f2afd14db223274d3427c.docx]

# Questionnaire on Pharmaceutical Care Services for Patients with Chronic Airway Diseases

## Part Ⅰ Patient Basic Information

1. Your age: ________
2. Your gender: 🞎Male 🞎Female
3. Your disease: 🞎COPD 🞎Asthma 🞎Other chronic airway diseases
4. How long have you had this disease? _____months/years
5. Do you smoke? 🞎No 🞎Yes (_______ cigarettes per day, for _______ years) 🞎Quit smoking ______months/years (used to smoke _______ cigarettes per day, smoking history of _______ years)
6. Your educational level: 🞎Primary school or below 🞎Middle school 🞎High school/ Technical secondary school 🞎Bachelor's degree/ Junior college degree 🞎Master's degree or above
7. Your personal monthly income: 🞎Below 1000 🞎1000 - 2999 🞎3000 - 4999 🞎5000 - 10000 🞎Above 10000

## Part Ⅱ Patients' Needs and Preferences for Pharmaceutical Care Services

To provide more targeted services, please indicate your true feelings by marking "√" on the corresponding number or option.

| Disease and Medication Cognition 1 = Strongly disagree, 2 = Disagree, 3 = Neutral, 4 = Agree, 5 = Strongly agree | | | | | | | |
| --- | --- | --- | --- | --- | --- | --- | --- |
| 1. Proper medication can effectively control my symptoms. | | 1 | 2 | | 3 | 4 | 5 |
| 1. It doesn't matter if I occasionally don't take medicine. | | 1 | 2 | | 3 | 4 | 5 |
| 1. I worry that long - term medication will harm my body. | | 1 | 2 | | 3 | 4 | 5 |
| 1. I'm concerned about becoming dependent on long - term medication. | | 1 | 2 | | 3 | 4 | 5 |
| Content Preferences1 = Not interested at all, 2 = Not very interested, 3 = Neutral, 4 = Interested, 5 = Very interested | | | | | | | |
| 1. The cause of my disease (Why do I have asthma / COPD?) | | 1 | 2 | | 3 | 4 | 5 |
| 1. What to do during acute exacerbation. | | 1 | 2 | | 3 | 4 | 5 |
| 1. The function of the medicine prescribed by the doctor. | | 1 | 2 | | 3 | 4 | 5 |
| 1. How long my medication course will last. | | 1 | 2 | | 3 | 4 | 5 |
| 1. The usage, dosage, and administration time of my medication. | | 1 | 2 | | 3 | 4 | 5 |
| 1. Whether there are drug - drug interactions with other medicines I am taking. | | 1 | 2 | | 3 | 4 | 5 |
| 1. The common adverse reactions of the medication. | | 1 | 2 | | 3 | 4 | 5 |
| 1. Precautions during drug treatment. | | 1 | 2 | | 3 | 4 | 5 |
| 1. How to exercise in daily life. | | 1 | 2 | | 3 | 4 | 5 |
| 1. Dietary considerations and foods to avoid. | | 1 | 2 | | 3 | 4 | 5 |
| Expression Preferences | | | | | | | |
| 1. When informing me about disease and medication - related knowledge:   🞎I expect the pharmacist to highlight key points.  🞎I expect the pharmacist to provide a systematic and comprehensive explanation. | | | | | | | |
| 1. When the pharmacist informs me about disease and medication - related knowledge, I prefer: (Multiple choices allowed)   🞎Indirectly through my family members  🞎Through written materials (e.g., popular science articles, videos, medication guides)  🞎Through telephone or WeChat communication  🞎Face - to - face communication | | | | | | | |
| 1. Which communication method do you think can better help you adhere to medical advice?   🞎Providing positive encouragement and support.  🞎Pointing out the serious consequences of non - adherence.  🞎A combination of the two. | | | | | | | |
| 1. Would you feel uncomfortable with strict warnings?   🞎Yes, I prefer gentle suggestions.  🞎No, it makes me take the pharmacist's advice more seriously. | | | | | | | |
| Influence of Promotion | Yes | | | No | | | |
| 1. My fellow patients have received pharmaceutical care services. |  | | |  | | | |
| 1. My attending physician has advised me to receive pharmaceutical care services. |  | | |  | | | |
| 1. The pharmacist at the dispensing window has advised me to receive pharmaceutical care services. |  | | |  | | | |
| 1. If my fellow patients recommend pharmaceutical care services to me, I will accept them. |  | | |  | | | |
| 1. If my attending physician advises me to receive pharmaceutical care services, I will accept them. |  | | |  | | | |
| 1. If the pharmacist at the dispensing window advises me to receive pharmaceutical care services, I will accept them. |  | | |  | | | |
| 1. If social media and netizens recommend that I seek pharmacists' help for medication consultation, I will accept it. |  | | |  | | | |

## Part Ⅲ Evaluation of Pharmaceutical Care Services

Please indicate your true feelings by marking "√" on the corresponding number.

1 = Strongly disagree, 2 = Disagree, 3 = Neutral, 4 = Agree, 5 = Strongly agree

| 1. I'm satisfied with the pharmaceutical care services I've received. | 1 | 2 | 3 | 4 | 5 |
| --- | --- | --- | --- | --- | --- |
| 1. Pharmaceutical care services are important for my disease management. | 1 | 2 | 3 | 4 | 5 |
| 1. I can master the disease and medication - related knowledge provided by the pharmacist and apply it to daily self - management. | 1 | 2 | 3 | 4 | 5 |
| 1. I'm willing to accept treatment recommendations and guidance from the pharmacist. | 1 | 2 | 3 | 4 | 5 |
| 1. Pharmaceutical care services enhance my understanding of my disease. | 1 | 2 | 3 | 4 | 5 |
| 1. Pharmaceutical care services can resolve my medication - related confusion and prevent medication errors. | 1 | 2 | 3 | 4 | 5 |
| 1. Pharmacists' supervision and guidance can improve my medication adherence and treatment outcomes. | 1 | 2 | 3 | 4 | 5 |
| 1. If I have medication - related questions in the future, I will seek help from pharmacists again. | 1 | 2 | 3 | 4 | 5 |
| 1. I would recommend others to consult pharmacists and receive pharmaceutical care services. | 1 | 2 | 3 | 4 | 5 |
| 1. I'm willing to receive pharmaceutical care services from pharmacists during hospitalization. | 1 | 2 | 3 | 4 | 5 |
| 1. I'm willing to pay 30 yuan per visit for pharmaceutical care clinic services (medicare - reimbursable). | 1 | 2 | 3 | 4 | 5 |
